# Supplementary material for: High-throughput single-cell analysis for the proteomic dynamics study of the yeast osmotic stress response
Source: PubMed Central journal article supplement (PMC5299847; doi:10.1038/srep42200), 2017-02-09
Supplement: srep42200-s1.pdf [file srep42200-s1.pdf]

# SUPPLEMENTARY INFORMATION

## **High-throughput single-cell analysis for the proteomic dynamics study of the yeast osmotic stress response**

Rongfei Zhang<sup>1</sup>, Haiyu Yuan<sup>2</sup>, Shujing Wang<sup>1</sup>, Qi Ouyang<sup>1,2,3</sup>, Yong Chen<sup>4</sup>, Nan Hao<sup>5</sup>, Chunxiong Luo<sup>1,2\*</sup>

<sup>1</sup>Center for Quantitative Biology, Academy for Advanced Interdisciplinary Studies, Peking University, Beijing, China

<sup>2</sup>The State Key Laboratory for Artificial Microstructures and Mesoscopic Physics, School of Physics, Peking University, Beijing, China

<sup>3</sup>Peking-Tsinghua Center for Life Sciences, Peking University, Beijing, China

<sup>4</sup>Ecole Normale Supérieure, 24 rue Lhomond, 75231 Paris, France

<sup>5</sup>Section of Molecular Biology, Division of Biological Sciences, University of California San Diego, La Jolla, California, USA.

\*To whom correspondence should be addressed: ChunxiongLuo, Email: pkuluocx@pku.edu.cn, Tel.: +86-10-62754743

**Supplementary Table S1** 96 important proteins for the osmotic stimuli experiment

**Supplementary Table S2** The functions of 40 proteins from the primary selected proteins

**Supplementary Table S3** The M2 values of the 40 proteins.

**Supplementary Fig. S1** The dynamic behaviors of SIP18 and PAI3 in different experiments (Test A and Test B). The stimuli (0.4 M KCl) are added at 180 min.

**Supplementary Fig. S2** The dynamic behaviors of (a) TPS2, (b) GPP1, (c) GRE2, and (d) MDH1 with different stimuli levels. The stimuli are added at 180 min.

|           |                |           |                |    |      |    |       |
|-----------|----------------|-----------|----------------|----|------|----|-------|
| <b>1</b>  | <b>UBP3</b>    | <b>25</b> | <b>DOG2</b>    | 49 | ALD3 | 73 | SNF1  |
| <b>2</b>  | <b>FIG4</b>    | <b>26</b> | <b>HSP26</b>   | 50 | TKL2 | 74 | GAL11 |
| <b>3</b>  | <b>PPZ1</b>    | <b>27</b> | <b>SOD2</b>    | 51 | RTN2 | 75 | RIM15 |
| <b>4</b>  | <b>GPH1</b>    | <b>28</b> | <b>YAR1</b>    | 52 | DDR2 | 76 | MSN5  |
| <b>5</b>  | <b>GLC3</b>    | <b>29</b> | <b>YPD1</b>    | 53 | HXK1 | 77 | TPK2  |
| <b>6</b>  | <b>TPS2</b>    | <b>30</b> | <b>PAI3</b>    | 54 | SKN7 | 78 | YAK1  |
| <b>7</b>  | <b>RCK2</b>    | <b>31</b> | <b>YJL144W</b> | 55 | GPD1 | 79 | GCN5  |
| <b>8</b>  | <b>PGM2</b>    | <b>32</b> | <b>SIP18</b>   | 56 | FPS1 | 80 | GIS1  |
| <b>9</b>  | <b>CTT1</b>    | <b>33</b> | <b>MPC3</b>    | 57 | AQY2 | 81 | PSR1  |
| <b>10</b> | <b>RVS167</b>  | <b>34</b> | <b>TOS6</b>    | 58 | GON7 | 82 | PSR2  |
| <b>11</b> | <b>PTC3</b>    | <b>35</b> | <b>HSP12</b>   | 59 | GRE1 | 83 | MSN4  |
| <b>12</b> | <b>MSC1</b>    | <b>36</b> | <b>PAN1</b>    | 60 | HLR1 | 84 | SNF2  |
| <b>13</b> | <b>ALD4</b>    | <b>37</b> | <b>ANP1</b>    | 61 | OSM1 | 85 | RIM11 |
| <b>14</b> | <b>DCS2</b>    | <b>38</b> | <b>HXT6</b>    | 62 | PBS2 | 86 | YGK3  |
| <b>15</b> | <b>COS8</b>    | <b>39</b> | <b>GSP2</b>    | 63 | POR2 | 87 | SRB10 |
| <b>16</b> | <b>YML131W</b> | <b>40</b> | <b>POR1</b>    | 64 | PPZ2 | 88 | CYR1  |
| <b>17</b> | <b>YPR1</b>    | 41        | HXT7           | 65 | SKO1 | 89 | TOR2  |
| <b>18</b> | <b>GRE2</b>    | 42        | USV1           | 66 | SMP1 | 90 | CDC25 |
| <b>19</b> | <b>GRE3</b>    | 43        | YGP1           | 67 | SSK2 | 91 | EAF7  |
| <b>20</b> | <b>GLO1</b>    | 44        | YNL300W        | 68 | STL1 | 92 | RAS2  |
| <b>21</b> | <b>TDH1</b>    | 45        | MCR1           | 69 | RPD3 | 93 | MSN2  |
| <b>22</b> | <b>MDH1</b>    | 46        | DDR48          | 70 | MCK1 | 94 | HOG1  |
| <b>23</b> | <b>GPP1</b>    | 47        | MMF1           | 71 | HDA3 | 95 | MSN1  |
| <b>24</b> | <b>RVS161</b>  | 48        | RLB5           | 72 | WHI2 | 96 | WHI5  |

**Supplementary Table S1** 96 important proteins for the osmotic stimuli experiment

|   |             |                                                                                                                                                                                                                                                                                                                                                                                                                                                                                               |
|---|-------------|-----------------------------------------------------------------------------------------------------------------------------------------------------------------------------------------------------------------------------------------------------------------------------------------------------------------------------------------------------------------------------------------------------------------------------------------------------------------------------------------------|
| 1 | <b>UBP3</b> | Ubiquitin-specific protease involved in transport and osmotic response; negatively regulates Ras/PKA signaling; interacts with Bre5p to coregulate anterograde, retrograde transport between ER and Golgi; involved in transcription elongation in response to osmotic stress through phosphorylation at Ser695 by Hog1p; inhibitor of gene silencing; role in ribophagy; cleaves ubiquitin fusions but not polyubiquitin; protein abundance increases in response to DNA replication stress. |
| 2 | <b>FIG4</b> | Phosphatidylinositol 3,5-bisphosphate (PtdIns[3,5]P) phosphatase; required for efficient mating and response to osmotic shock; physically associates with and regulated by Vac14p; contains a SAC1-like domain; homologous to human FIG4, which is associated with CMT4J, a form of Charcot-Marie-Tooth disorder.                                                                                                                                                                             |
| 3 | <b>PPZ1</b> | Serine/threonine protein phosphatase Z, isoform of Ppz2p; involved in regulation of potassium transport, which affects osmotic stability, cell cycle progression, and halotolerance.                                                                                                                                                                                                                                                                                                          |
| 4 | <b>GPH1</b> | Glycogen phosphorylase required for the mobilization of glycogen; non-essential; regulated by cyclic AMP-mediated phosphorylation; expression is regulated by stress-response elements and by the HOG MAP kinase pathway.                                                                                                                                                                                                                                                                     |
| 5 | <b>GLC3</b> | Glycogen branching enzyme, involved in glycogen accumulation; green fluorescent protein (GFP)-fusion protein localizes to the cytoplasm in a punctate pattern; relocalizes from nucleus to cytoplasmic foci upon DNA replication stress; glycogen accumulation defect of the null mutant is functionally complemented by human GBE1, which is associated with glycogen storage disease.                                                                                                       |
| 6 | <b>TPS2</b> | Phosphatase subunit of the trehalose-6-P synthase/phosphatase complex; involved in synthesis of the storage carbohydrate trehalose; expression is induced by stress conditions and repressed by the Ras-cAMP pathway; protein abundance increases in response to DNA replication stress.                                                                                                                                                                                                      |
| 7 | <b>RCK2</b> | Protein kinase involved in response to oxidative and osmotic stress; identified as suppressor of <i>S. pombe</i> cell cycle checkpoint mutations; similar to CaM (calmodulin) kinases; RCK2 has a paralog, RCK1, that arose from the whole genome duplication.                                                                                                                                                                                                                                |

|    |               |                                                                                                                                                                                                                                                                                                                                                                                                                                    |
|----|---------------|------------------------------------------------------------------------------------------------------------------------------------------------------------------------------------------------------------------------------------------------------------------------------------------------------------------------------------------------------------------------------------------------------------------------------------|
| 8  | <b>PGM2</b>   | Phosphoglucomutase; catalyzes the conversion from glucose-1-phosphate to glucose-6-phosphate, which is a key step in hexose metabolism; functions as the acceptor for a Glc-phosphotransferase; protein abundance increases in response to DNA replication stress; PGM2 has a paralog, PGM1, that arose from the whole genome duplication.                                                                                         |
| 9  | <b>CTT1</b>   | Cytosolic catalase T; has a role in protection from oxidative damage by hydrogen peroxide 3.                                                                                                                                                                                                                                                                                                                                       |
| 10 | <b>RVS167</b> | Actin-associated protein with roles in endocytosis and exocytosis; N-BAR domain protein that interacts with Rvs161p to regulate actin cytoskeleton, endocytosis, and viability following starvation or osmotic stress; recruited to bud tips by Gyl1p and Gyp5p during polarized growth; homolog of mammalian amphiphysin.                                                                                                         |
| 11 | <b>PTC3</b>   | type 2C protein phosphatase (PP2C); dephosphorylates Hog1p (see also Ptc2p) to limit maximal kinase activity induced by osmotic stress; dephosphorylates T169 phosphorylated Cdc28p (see also Ptc2p); role in DNA damage checkpoint inactivation; PTC3 has a paralog, PTC2, that arose from the whole genome duplication.                                                                                                          |
| 12 | <b>MSC1</b>   | Protein of unknown function; mutant is defective in directing meiotic recombination events to homologous chromatids; the authentic, non-tagged protein is detected in highly purified mitochondria and is phosphorylated.                                                                                                                                                                                                          |
| 13 | <b>ALD4</b>   | Mitochondrial aldehyde dehydrogenase; required for growth on ethanol and conversion of acetaldehyde to acetate; phosphorylated; activity is K <sup>+</sup> dependent; utilizes NADP <sup>+</sup> or NAD <sup>+</sup> equally as coenzymes; expression is glucose repressed; can substitute for cytosolic NADP-dependent aldehyde dehydrogenase when directed to the cytosol; human homolog ALDH2 can complement yeast ald4 mutant. |
| 14 | <b>DCS2</b>   | m(7)GpppX pyrophosphatase regulator; non-essential, stress induced regulatory protein; modulates m7G-oligoribonucleotide metabolism; inhibits Dcs1p; regulated by Msn2p, Msn4p, and the Ras-cAMP-cAPK signaling pathway; mutant has increased aneuploidy tolerance; DCS2 has a paralog, DCS1, that arose from the whole genome duplication.                                                                                        |

|    |                |                                                                                                                                                                                                                                                                                                                                                                                                                                                                                          |
|----|----------------|------------------------------------------------------------------------------------------------------------------------------------------------------------------------------------------------------------------------------------------------------------------------------------------------------------------------------------------------------------------------------------------------------------------------------------------------------------------------------------------|
| 15 | <b>COS8</b>    | Endosomal protein involved in turnover of plasma membrane proteins; member of the DUP380 subfamily of conserved, often subtelomeric COS genes; required for the multivesicular vesicle body sorting pathway that internalizes plasma membrane proteins for degradation; Cos proteins provide ubiquitin in trans for nonubiquitinated cargo proteins.                                                                                                                                     |
| 16 | <b>YML131W</b> | Protein of unknown function; similar to medium chain dehydrogenase/reductases; expression induced by stresses including osmotic shock, DNA damaging agents, and other chemicals; GFP-fusion protein localizes to the cytoplasm; protein abundance increases in response to DNA replication stress.                                                                                                                                                                                       |
| 17 | <b>YPR1</b>    | NADPH-dependent aldo-keto reductase; reduces multiple substrates including 2-methylbutyraldehyde and D,L-glyceraldehyde, expression is induced by osmotic and oxidative stress; functionally redundant with other aldo-keto reductases; protein abundance increases in response to DNA replication stress; YPR1 has a paralog, GCY1, that arose from the whole genome duplication; human homolog AKR1B1 can complement yeast null mutant.                                                |
| 18 | <b>GRE2</b>    | 3-methylbutanal reductase and NADPH-dependent methylglyoxal reductase; stress induced (osmotic, ionic, oxidative, heat shock and heavy metals); regulated by the HOG pathway; restores resistance to glycolaldehyde by coupling reduction of glycolaldehyde to ethylene glycol and oxidation of NADPH to NADP <sup>+</sup> ; protein abundance increases in response to DNA replication stress; methylglyoxal reductase (NADPH-dependent) is also known as D-lactaldehyde dehydrogenase. |
| 19 | <b>GRE3</b>    | Aldose reductase; involved in methylglyoxal, d-xylose, arabinose, and galactose metabolism; stress induced (osmotic, ionic, oxidative, heat shock, starvation and heavy metals); regulated by the HOG pathway; protein abundance increases in response to DNA replication stress.                                                                                                                                                                                                        |
| 20 | <b>GL01</b>    | Monomeric glyoxalase I; catalyzes the detoxification of methylglyoxal (a by-product of glycolysis) via condensation with glutathione to produce S-D-lactoylglutathione; expression regulated by methylglyoxal levels and osmotic stress.                                                                                                                                                                                                                                                 |

|    |               |                                                                                                                                                                                                                                                                                                                                                                                                                                                                     |
|----|---------------|---------------------------------------------------------------------------------------------------------------------------------------------------------------------------------------------------------------------------------------------------------------------------------------------------------------------------------------------------------------------------------------------------------------------------------------------------------------------|
| 21 | <b>TDH1</b>   | Glyceraldehyde-3-phosphate dehydrogenase (GAPDH), isozyme 1; involved in glycolysis and gluconeogenesis; tetramer that catalyzes the reaction of glyceraldehyde-3-phosphate to 1,3 bis-phosphoglycerate; detected in the cytoplasm and cell wall; protein abundance increases in response to DNA replication stress; GAPDH-derived antimicrobial peptides secreted by <i>S. cerevisiae</i> are active against a wide variety of wine-related yeasts and bacteria 1. |
| 22 | <b>MDH1</b>   | Mitochondrial malate dehydrogenase; catalyzes interconversion of malate and oxaloacetate; involved in the tricarboxylic acid (TCA) cycle; phosphorylated.                                                                                                                                                                                                                                                                                                           |
| 23 | <b>GPP1</b>   | Constitutively expressed DL-glycerol-3-phosphate phosphatase; also known as glycerol-1-phosphatase; involved in glycerol biosynthesis, induced in response to both anaerobic and osmotic stress; GPP1 has a paralog, GPP2, that arose from the whole genome duplication.                                                                                                                                                                                            |
| 24 | <b>RVS161</b> | Amphiphysin-like lipid raft protein; N-BAR domain protein that interacts with Rvs167p and regulates polarization of the actin cytoskeleton, endocytosis, cell polarity, cell fusion and viability following starvation or osmotic stress.                                                                                                                                                                                                                           |
| 25 | <b>DOG2</b>   | 2-deoxyglucose-6-phosphate phosphatase; member of a family of low molecular weight phosphatases, induced by oxidative and osmotic stress, confers 2-deoxyglucose resistance when overexpressed; DOG2 has a paralog, DOG1, that arose from a single-locus duplication; the last half of DOG1 and DOG2 are subject to gene conversions among <i>S. cerevisiae</i> , <i>S. paradoxus</i> , and <i>S. mikatae</i> .                                                     |
| 26 | <b>HSP26</b>  | Small heat shock protein (sHSP) with chaperone activity; forms hollow, sphere-shaped oligomers that suppress unfolded proteins aggregation; long-lived protein that is preferentially retained in mother cells and forms cytoplasmic foci; oligomer activation requires heat-induced conformational change; also has mRNA binding activity 3.                                                                                                                       |
| 27 | <b>SOD2</b>   | Mitochondrial manganese superoxide dismutase; protects cells against oxygen toxicity.                                                                                                                                                                                                                                                                                                                                                                               |
| 28 | <b>YAR1</b>   | Ankyrin-repeat containing, nucleocytoplasmic shuttling chaperone; prevents aggregation of Rps3p in the cytoplasm, associates with nascent Rps3p during its                                                                                                                                                                                                                                                                                                          |

|    |         |                                                                                                                                                                                                                                                                                                                                                                                                                                                |
|----|---------|------------------------------------------------------------------------------------------------------------------------------------------------------------------------------------------------------------------------------------------------------------------------------------------------------------------------------------------------------------------------------------------------------------------------------------------------|
|    |         | translation in the cytoplasm and delivers it to the 90S in the nucleus; required for 40S ribosomal subunit export, biogenesis and adaptation to osmotic and oxidative stress; expression repressed by heat shock.                                                                                                                                                                                                                              |
| 29 | YPD1    | Osmotic stress-responsive phosphorelay intermediate sensor protein; phosphorylated by the plasma membrane sensor Sln1p in response to osmotic stress and then in turn phosphorylates the response regulators Ssk1p in the cytosol and Skn7p in the nucleus.                                                                                                                                                                                    |
| 30 | PAI3    | Cytoplasmic proteinase A (Pep4p) inhibitor; dependent on Pbs2p and Hog1p protein kinases for osmotic induction; intrinsically unstructured, N-terminal half becomes ordered in the active site of proteinase A upon contact.                                                                                                                                                                                                                   |
| 31 | YJL144W | Cytoplasmic hydrophilin essential in desiccation-rehydration process; expression induced by osmotic stress, starvation and during stationary phase; protein abundance increases in response to DNA replication stress 1.                                                                                                                                                                                                                       |
| 32 | SIP18   | Phospholipid-binding hydrophilin; essential to overcome desiccation-rehydration process; expression is induced by osmotic stress; SIP18 has a paralog, GRE1, that arose from the whole genome duplication.                                                                                                                                                                                                                                     |
| 33 | MPC3    | Highly conserved subunit of the mitochondrial pyruvate carrier (MPC); expressed during growth on nonfermentable carbon sources, and heterodimerizes with Mpc1p to form the respiratory isoform of MPC; MPC localizes to the mitochondrial inner membrane and mediates pyruvate uptake; MPC3 paralog, MPC2, heterodimerizes with Mpc1p to form the fermentative MPC isoform; protein abundance increases in response to DNA replication stress. |
| 34 | TOS6    | Glycosylphosphatidylinositol-dependent cell wall protein; expression is periodic and decreases in response to ergosterol perturbation or upon entry into stationary phase; depletion increases resistance to lactic acid.                                                                                                                                                                                                                      |
| 35 | HSP12   | Plasma membrane protein involved in maintaining membrane organization; involved in maintaining organization during stress conditions; induced by heat shock, oxidative stress, osmostress, stationary phase, glucose depletion, oleate and alcohol; protein abundance increased in response to DNA replication stress and                                                                                                                      |

|    |      |                                                                                                                                                                                                                                                                                                                                                                                                                  |
|----|------|------------------------------------------------------------------------------------------------------------------------------------------------------------------------------------------------------------------------------------------------------------------------------------------------------------------------------------------------------------------------------------------------------------------|
|    |      | <p>dietary restriction; regulated by the HOG and Ras-Pka pathways; required for dietary restriction-induced lifespan extension.</p>                                                                                                                                                                                                                                                                              |
| 36 | PAN1 | <p>Part of actin cytoskeleton-regulatory complex Pan1p-Sla1p-End3p; associates with actin patches on cell cortex; promotes protein-protein interactions essential for endocytosis; binds to and activates Arp2/3 complex in vitro; phosphorylation of Thr-1225 is regulated by MAPK Hog1p in response to osmotic stress; previously thought to be a subunit of poly(A) ribonuclease.</p>                         |
| 37 | ANP1 | <p>Subunit of the alpha-1,6 mannosyltransferase complex; type II membrane protein; has a role in retention of glycosyltransferases in the Golgi; involved in osmotic sensitivity and resistance to aminonitrophenyl propanediol.</p>                                                                                                                                                                             |
| 38 | HXT6 | <p>High-affinity glucose transporter; member of the major facilitator superfamily, nearly identical to Hxt7p, expressed at high basal levels relative to other HXTs, repression of expression by high glucose requires SNF3; HXT6 has a paralog, HXT1, that arose from the whole genome duplication.</p>                                                                                                         |
| 39 | GSP2 | <p>GTP binding protein (mammalian Ranp homolog); involved in the maintenance of nuclear organization, RNA processing and transport; interacts with Kap121p, Kap123p and Pdr6p (karyophilin betas); not required for viability; protein abundance increases in response to DNA replication stress; GSP2 has a paralog, GSP1, that arose from the whole genome duplication 1.</p>                                  |
| 40 | POR1 | <p>Mitochondrial porin (voltage-dependent anion channel); outer membrane protein required for maintenance of mitochondrial osmotic stability and mitochondrial membrane permeability; couples the glutathione pools of the intermembrane space (IMS) and the cytosol; interacts with Om45 and Om14 in the outer membrane; phosphorylated; protein abundance increases in response to DNA replication stress.</p> |

**Supplementary Table S2** The functions of 40 proteins from the primary selected proteins



| Gene    | M2       | Gene    | M2       |
|---------|----------|---------|----------|
| HSP12   | 0.15312  | GL01    | 0.050379 |
| PGM2    | 0.124257 | YPR1    | 0.050098 |
| GRE2    | 0.123721 | ANP1    | 0.049418 |
| TDH1    | 0.121697 | RVS161  | 0.047604 |
| GPH1    | 0.092405 | PPZ1    | 0.047256 |
| TPS2    | 0.08436  | UBP3    | 0.046457 |
| PAI3    | 0.072141 | GRE3    | 0.045428 |
| SIP18   | 0.069776 | DCS2    | 0.044157 |
| CTT1    | 0.067589 | YPD1    | 0.042697 |
| ALD4    | 0.061341 | MPC3    | 0.041139 |
| MDH1    | 0.060178 | FIG4    | 0.039532 |
| GSP2    | 0.055119 | SOD2    | 0.039479 |
| YML131W | 0.054998 | YJL144W | 0.039278 |
| TOS6    | 0.053963 | POR1    | 0.038654 |
| HSP26   | 0.053951 | PTC3    | 0.037191 |
| MSC1    | 0.053087 | YAR1    | 0.03599  |
| DOG2    | 0.052952 | HXT6    | 0.035307 |
| GPP1    | 0.052837 | COS8    | 0.034797 |
| PAN1    | 0.050747 | RVS167  | 0.033569 |
| GLC3    | 0.05074  | RCK2    | 0.031353 |

**Supplementary Table S3** The M2 values of the 40 proteins.

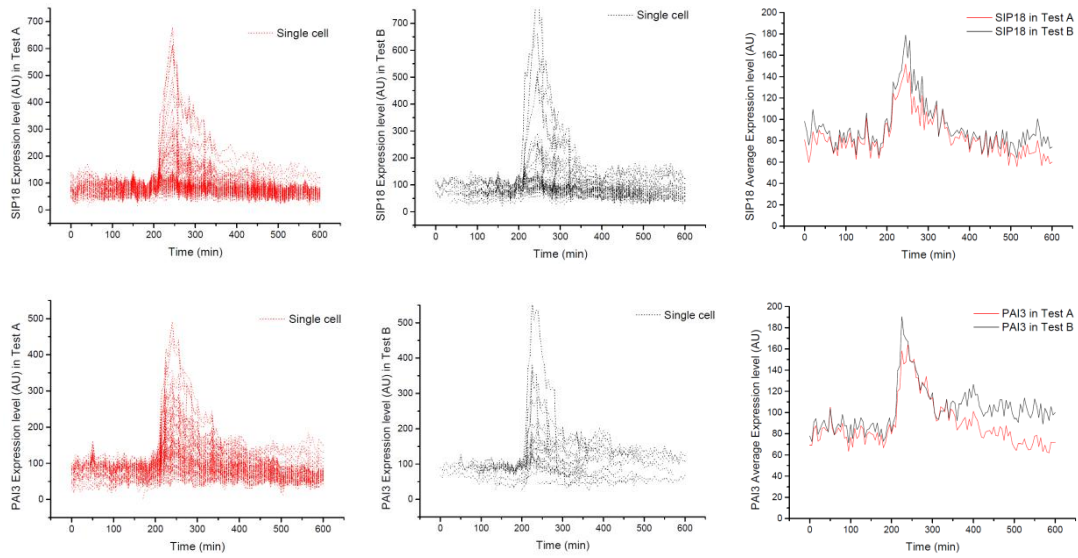

**Supplementary Fig. S1** The dynamic behaviors of SIP18 and PAI3 in different experiments (Test A and Test B). The stimuli (0.4 M KCl) are added at 180 min.

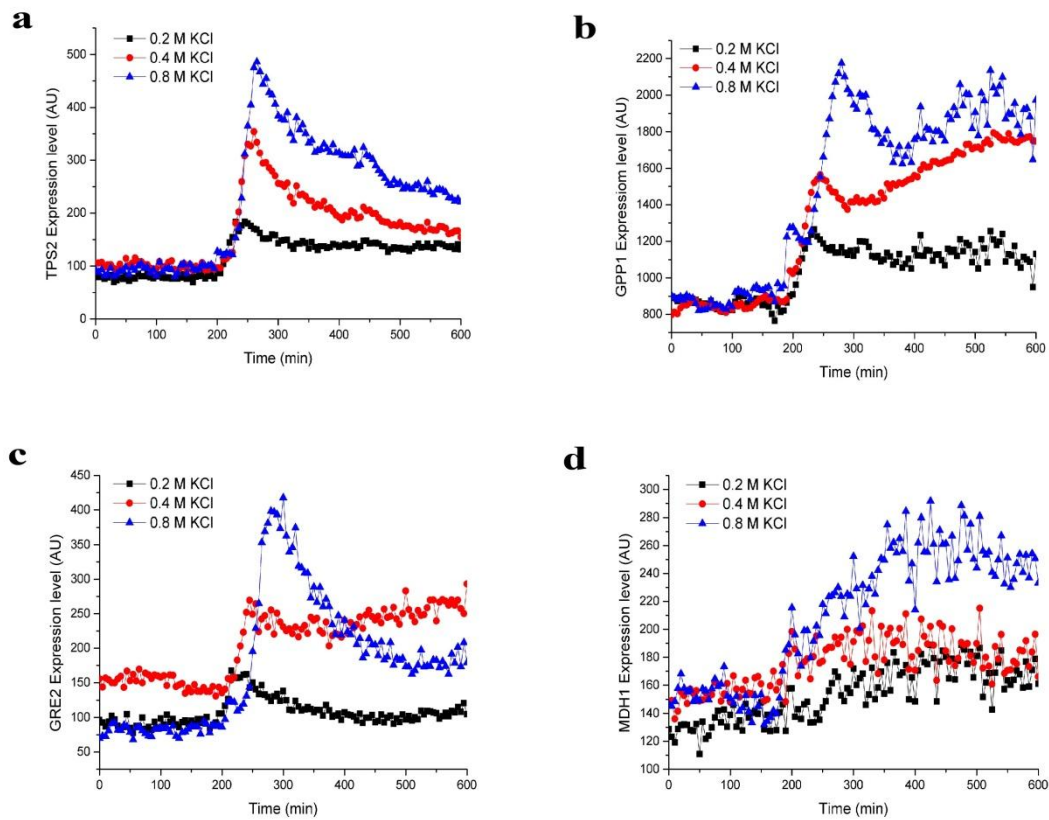

**Supplementary Fig. S2** The dynamic behaviors of (a) TPS2, (b) GPP1, (c) GRE2, and (d) MDH1 with different stimuli levels. The stimuli are added at 180 min.
